# Supplementary material for: Phox2b mutation mediated by Atoh1 expression impaired respiratory rhythm and ventilatory responses to hypoxia and hypercapnia
Source: eLife. 2022 Nov 17;11:e73130. doi: 10.7554/eLife.73130 (PMC9683783; doi:10.7554/eLife.73130)
Supplement: Figure 1—source data 1. [file elife-73130-fig1-data1.xlsx]

## Sheet: Figure 2
Respiratory Frequency (bpm)					Tidal volume (µl/g)					VE (µl/min/g)					Ti (s)					Te (s)					Cycle duration (s)					Inter-breath interval
Neonates		Adults			Neonates		Adults			Neonates		Adults			Neonates		Adults			Neonates		Adults			Neonates		Adults			Neonates		Adults
Control	Phox2b∆8	Control	Phox2b∆8		Control	Phox2b∆8	Control	Phox2b∆8		Control	Phox2b∆8	Control	Phox2b∆8		Control	Phox2b∆8	Control	Phox2b∆8		Control	Phox2b∆8	Control	Phox2b∆8		Control	Phox2b∆8	Control	Phox2b∆8		Control	Phox2b∆8	Control	Phox2b∆8
179	131	213	191		9.4	16	10.405	10.222		1682.6	2096	2216.26	1952.4		0.093	0.145	0.098	0.0989261		0.282	0.429	0.2	0.233893		0.375	0.574	0.298	0.332819		0.101	0.089	0.025	0.068
167	185	192	242		8.2	12	9.597	12.278		1369.4	2220	1842.62	2971.28		0.1	0.107	0.089	0.0723329		0.325	0.259	0.197	0.237944		0.425	0.366	0.286	0.310277		0.172	0.251	0.021	0.133
191	132	218	236		8	11	11.494	15.22		1528	1452	2505.69	3591.92		0.1	0.19	0.101	0.0862352		0.325	0.33	0.217	0.187136		0.425	0.52	0.318	0.273371		0.062	0.076	0.027	0.054
149	251	216	251		10.8	16	12.238	12.819		1609.2	4016	2643.41	3217.57		0.108	0.085	0.107	0.0695044		0.365	0.159	0.177	0.200415		0.473	0.244	0.284	0.269919		0.095	0.146	0.022	0.117
137	241	213	242		9.2	15	12.153	16.756		1260.4	3615	2588.59	4054.95		0.161	0.087	0.101	0.0746065		0.317	0.167	0.186	0.214835		0.478	0.254	0.287	0.289442		0.09	0.032	0.042	0.06
179	202	233	226		11	13	17.538	24.877		1969	2626	4086.35	5622.2		0.12	0.098	0.085	0.0851174		0.29	0.217792	0.187	0.208949		0.41	0.315792	0.272	0.294066		0.113	0.035	0.018	0.093
218	178	245	224		9.7	9.7	14.432	17.292		2114.6	1726.6	3535.84	3873.41		0.092	0.101	0.085	0.0802861		0.19	0.252914	0.171	0.221084		0.282	0.353914	0.256	0.30137		0.021	0.122	0.033	0.091
180	112	214	240		17.8	11	10.366	13.895		3204	1232	2218.32	3334.8		0.104	0.103	0.098	0.0854446		0.243	0.462199	0.197	0.187456		0.347	0.565199	0.295	0.272901		0.045	0.057		0.064
147	185	215	189		9.4	10.1	12.3	15.6		1381.8	1868.5	2644.5	2948.4		0.114	0.106	0.097	0.087		0.319	0.48	0.178	0.189		0.433	0.586	0.275	0.276		0.043	0.051
98	173	219	199		7.5	9.7	11.4	12.3		735	1678.1	2496.6	2447.7		0.214	0.087	0.089	0.075		0.533	0.55	0.184	0.195		0.747	0.637	0.273	0.27
165	159	222	218		8.3	8.9	10.9	11.6		1369.5	1415.1	2419.8	2528.8		0.15	0.099	0.102	0.082		0.52	0.412	0.0196	0.0185		0.67	0.511	0.1216	0.1005
144	168	196	219		9.4	8.8	11.4	15.2		1353.6	1478.4	2234.4	3328.8		0.123	0.119	0.103	0.079		0.48	0.38	0.0188	0.0187		0.603	0.499	0.1218	0.0977
162					8.6					1393.2					0.116					0.46					0.576
177					8.2					1451.4					0.114					0.46					0.574
163.786	176.417	216.333	223.083		10.1	12.35	12.0186	14.8383		1601.55	2118.64	2619.37	3322.69		0.122071	0.110583	0.09625	0.0812878		0.364929	0.341575	0.161033	0.176076		0.487	0.452159	0.2844	0.289017		0.0824444	0.0954444	0.0268571	0.085	Mean
28.4637	41.6794	13.7824	22.9008		2.93106	2.51584	2.13039	3.82685		563.566	886.927	613.248	941.378		0.0330116	0.0298556	0.0074116	0.0080347		0.107119	0.129747	0.0673787	0.0755259		0.130388	0.137586	0.0170437	0.0209476		0.0456402	0.0698303	0.00823465	0.0286456	SD
7.60724	12.0318	3.97865	6.61088		0.783359	0.72626	0.614992	1.10472		150.619	256.034	177.03	271.752		0.00882271	0.00861857	0.00213954	0.00231942		0.0286286	0.0374548	0.0194506	0.0218025		0.0348477	0.0397178	0.0049201	0.00604705		0.0152134	0.0232768	0.00311241	0.0101278	SEM
14	12	12	12		14	12	12	12		14	12	12	12		14	12	12	12		14	12	12	12		14	12	12	12		9	9	7	8	n
Apnea (numbers/min)					VO2 (µl/min/g)					VCO2 (µl/min/g)					VE/VO2					VCO2/VO2					Para Experimento a 32°C
Neonates		Adults			Neonates		Adults			Neonates		Adults			Neonates		Adults			Neonates		Adults			Neonate control
Control	Phox2b∆8	Control	Phox2b∆8		Control	Phox2b∆8	Control	Phox2b∆8		Control	Phox2b∆8	Control	Phox2b∆8		Control	Phox2b∆8	Control	Phox2b∆8		Control	Phox2b∆8	Control	Phox2b∆8			Peso (kg)	Fluxo (ml/min)	%iO2	%eO2	FiO2	FeO2	VO2 (-CO2)	VO2/kg	VO2/Kg STPD	VE/VO2
5	18	3	8		336520	806154	73875.5	88745.5		121147	290215	26595.2	31948.4		0.005	0.0026	0.03	0.022		0.36	0.36	0.36	0.36			0.0027	40	21	19	0.21	0.19	0.82602	305.933	243.217	5.63078
8	12	4	11		342350	541463	57582	114280		123246	194927	20729.5	41140.7		0.004	0.0041	0.032	0.026		0.36	0.36	0.36	0.36			0.0031	40	21	19.1	0.21	0.191	0.784719	253.135	201.242	6.72622
2	15	3	5		305600	290400	75930.1	156170		110016	104544	27334.8	56221.4		0.005	0.005	0.033	0.023		0.36	0.36	0.36	0.36			0.0032	40	21	18.7	0.21	0.187	0.949923	296.851	235.996	5.90348
3	20	3	6		459771	1.51547e+06	94407.4	107252		165518	545570	33986.7	38610.8		0.0035	0.00265	0.028	0.03		0.36	0.36	0.36	0.36			0.0026	40	20.9	18.9	0.209	0.189	0.825892	317.651	252.532	5.74738
6	14	2	7		291759	877427	71905.2	135165		105033	315874	25885.9	48659.4		0.00432	0.00412	0.036	0.03		0.36	0.36	0.36	0.36
3	11	4	5		393800	707817	120187	208230		141768	254814	43267.3	74962.7		0.005	0.00371	0.034	0.027		0.36	0.36	0.36	0.36
7	8	2	4		896017	506334	110495	168409		322566	182013	39778.2	60627.3		0.00236	0.00341	0.032	0.023		0.36	0.359473	0.36	0.36
5	10	2	6		777670	394872	76493.9	101055		279961	142154	27537.8	36379.6		0.00412	0.00312	0.029	0.033		0.36	0.36	0.36	0.36		Mean	0.0029	40	20.975	18.925	0.20975	0.18925	0.846638	293.392	233.247	6.00196
5	11	2	12		294000	598878				105840	215596				0.0047	0.00312				0.36	0.36				SD	0.000294392	0	0.05	0.170783	0.0005	0.00170783	0.0715477	28.1564	22.3843	0.495592
6	18	3	8		147000	537853				52920	193627				0.005	0.00312				0.36	0.36				SEM	0.000147196	0	0.025	0.0853913	0.00025	0.000853913	0.0357739	14.0782	11.1922	0.247796
4	16	4	9		273900	453558				98604	163281				0.005	0.00312				0.36	0.36				n	4	4	4	4	4	4	4	4	4	4
3	17	3	11		270720	473846				97459.2	170585				0.005	0.00312				0.36	0.36
5					278640					100310					0.005					0.36
6					290280					104501					0.005					0.36					Neonate mutant
																										Peso (kg)	Fluxo (ml/min)	%iO2	%eO2	FiO2	FeO2	VO2 (-CO2)	VO2/kg	VO2/Kg STPD	VE/VO2
4.85714	14.1667	2.91667	7.66667		382716	642006	85109.5	134913		137778	231100	30639.4	48568.8		0.0045	0.0034325	0.03175	0.02675		0.36	0.359956	0.36	0.36			0.0021	40	21	19.2	0.21	0.192	0.743418	354.008	281.437	6.63915
1.70326	3.76185	0.792961	2.64002		205820	321835	21307.6	40387.3		74095.1	115871	7670.75	14539.4		0.000786736	0.000690614	0.00265922	0.00399106		4.35465e-17	0.000152157	5.13933e-17	7.56489e-17			0.0019	40	21	19.8	0.21	0.198	0.495612	260.848	207.374	8.09213
0.455216	1.08595	0.228908	0.762108		55007.6	92905.8	7533.39	14279.1		19802.8	33449.1	2712.02	5140.46		0.000210264	0.000218391	0.000940175	0.00141105		1.16383e-17	4.39239e-05	1.81703e-17	2.67459e-17			0.0022	40	21	19.6	0.21	0.196	0.578214	262.824	208.945	6.77258
14	12	12	12		14	12	8	8		14	12	8	8		14	10	8	8		14	12	8	8			0.00189	40	20.9	19	0.209	0.19	0.784597	415.131	330.029	4.47961
																									Mean	0.0020225	40	20.975	19.4	0.20975	0.194	0.65046	323.203	256.946	6.49587
																									SD	0.000152834	0	0.05	0.365148	0.0005	0.00365148	0.13642	75.1296	59.728	1.4956
																									SEM	7.64172e-05	0	0.025	0.182574	0.00025	0.00182574	0.0682101	37.5648	29.864	0.7478
																									n	4	4	4	4	4	4	4	4	4	4
																									Adult control
																										Peso (kg)	Fluxo (ml/min)	%iO2	%eO2	FiO2	FeO2	VO2 (-CO2)	VO2/kg	VO2/Kg STPD	VE/VO2
																										0.028	500	21	20.2	0.21	0.202	4.1301	147.504	117.265	22.0746
																										0.033	500	21	1.8	0.21	0.018	99.1224	3003.71	2387.95	1.71124
																										0.025	500	21	19.5	0.21	0.195	7.74393	309.757	246.257	14.3583
																										0.029	500	20.9	20.1	0.209	0.201	4.12946	142.395	113.204	19.5958
																									Mean	0.02875	500	20.975	15.4	0.20975	0.154	28.7815	900.841	716.169	14.435
																									SD	0.00330404	0	0.05	9.07193	0.0005	0.0907193	46.9249	1404.06	1116.23	9.07189
																									SEM	0.00165202	0	0.025	4.53597	0.00025	0.0453597	23.4624	702.032	558.115	4.53595
																									n	4	4	4	4	4	4	4	4	4	4
																									Adult mutant
																										Peso (kg)	Fluxo (ml/min)	%iO2	%eO2	FiO2	FeO2	VO2 (-CO2)	VO2/kg	VO2/Kg STPD	VE/VO2
																										0.022	500	21	19.6	0.21	0.196	7.22767	328.531	261.182	15.5254
																										0.025	500	21	19.8	0.21	0.198	6.19515	247.806	197.006	28.5383
																										0.027	500	21	19.9	0.21	0.199	5.67888	210.329	167.212	23.1647
																										0.026	500	21	20	0.21	0.2	5.16262	198.562	157.857	21.1254
																									Mean	0.025	500	21	19.825	0.21	0.19825	6.06608	246.307	195.814	22.0885
																									SD	0.00216025	0	0	0.170783	0	0.00170783	0.881686	58.6996	46.6661	5.37772
																									SEM	0.00108012	0	0	0.0853913	0	0.000853913	0.440843	29.3498	23.3331	2.68886
																									n	4	4	4	4	4	4	4	4	4	4
