# Supplementary material for: Phox2b mutation mediated by Atoh1 expression impaired respiratory rhythm and ventilatory responses to hypoxia and hypercapnia
Source: eLife. 2022 Nov 17;11:e73130. doi: 10.7554/eLife.73130 (PMC9683783; doi:10.7554/eLife.73130)
Supplement: Figure 2—source data 1. [file elife-73130-fig2-data1.xlsx]

## Sheet: Figure 3
SD1 (ms)					SD2 (ms)
Neonates		Adults			Neonates		Adults
Control	Phox2b∆8	Control	Phox2b∆8		Control	Phox2b∆8	Control	Phox2b∆8
144.5	306.9	26.7	87.4		135.5	288.5	37.7	142.4
266.3	103.3	34.8	95.3		327.6	144.1	48.4	137.5
70.3	202.3	44.9	58.4		58.7	160.4	64.1	77.5
229.6	52.4	29.8	99		305.6	55.8	60.3	119.6
254	38	56	59.2		554.9	45	75.8	114.9
40.2	111.8	35	78.3		45.2	106.7	63.3	84.1
68.4	81.7	36.4	82.1		91.1	94	48.3	106.4
110.3	155.66	37	61.9		98.8	181.23	57	76.3
370	275	49	68		400	175	62	121
152	215	54	74		211	168	49	119
89	126	26	89		132	202	74	97
115	176	101	102		158	119	66	86
63					289
72					356
146.043	153.672	44.2167	79.55		225.957	144.977	58.825	106.808	Mean
97.7181	84.5845	20.4841	15.4524		150.105	67.0965	11.2638	22.6086	SD
26.1163	24.4174	5.91325	4.46071		40.1173	19.3691	3.25158	6.52655	SEM
14	12	12	12		14	12	12	12	n
