# Supplementary material for: Phox2b mutation mediated by Atoh1 expression impaired respiratory rhythm and ventilatory responses to hypoxia and hypercapnia
Source: eLife. 2022 Nov 17;11:e73130. doi: 10.7554/eLife.73130 (PMC9683783; doi:10.7554/eLife.73130)
Supplement: Figure 3—source data 1. [file elife-73130-fig3-data1.xlsx]

## Sheet: Figure 4
Respiratory frequency (%)							Vt (%)							VE (%)
Baseline		Hypoxia		Hypercapnia			Baseline		Hypoxia		Hypercapnia			Baseline		Hypoxia		Hypercapnia
Control	Phox2b∆8	Control	Phox2b∆8	Control	Phox2b∆8		Control	Phox2b∆8	Control	Phox2b∆8	Control	Phox2b∆8		Control	Phox2b∆8	Control	Phox2b∆8	Control	Phox2b∆8
109	73	131	168	122	94		93	120	174	70	159	89		100	81	227	126	194	90
101	103	156	144	121	135		82	91	237	68	192	97		82	92	369	98	233	131
116	74	132	119	127	114		79	87	169	103	134	169		91	63	223	123	170	193
91	140	156	100	135	108		107	122	94	95	138	100		95	169	147	95	186	108
83	135	165	102	161	104		91	119	158	116	101	115		75	158	261	118	162	119
109	113	134	129	116	132		109	100	108	121	106	163		117	111	145	155	123	215
132	99	130	133	115	119		96	75	192	146	184	178		126	74	250	195	211	212
109	62	147	96	122	103		176	85	118	126	127	88		190	52	173	121	155	91
89		125		130			93		124		118			82		155		153
60		116		144			75		87		84			44		102		120
99.9	99.875	139.2	123.875	129.3	113.625		100.1	99.875	146.1	105.625	134.3	124.875		100.2	100	205.2	128.875	170.7	144.875		Mean
20.0413	28.9158	15.8521	24.8161	14.2052	14.372		28.85	18.3025	48.0172	27.2393	35.2485	38.4761		38.8438	43.1277	77.4321	32.4673	36.1541	53.2848		SD
6.33763	10.2233	5.01287	8.77382	4.49209	5.08126		9.12317	6.47092	15.1844	9.63056	11.1465	13.6034		12.2835	15.248	24.4862	11.4789	11.4329	18.839		SEM
10	8	10	8	10	8		10	8	10	8	10	8		10	8	10	8	10	8		n
