# Supplementary material for: Phox2b mutation mediated by Atoh1 expression impaired respiratory rhythm and ventilatory responses to hypoxia and hypercapnia
Source: eLife. 2022 Nov 17;11:e73130. doi: 10.7554/eLife.73130 (PMC9683783; doi:10.7554/eLife.73130)
Supplement: Figure 4—source data 1. [file elife-73130-fig4-data1.xlsx]

## Sheet: Figure 5
Respiratory frequency (%)								Vt (%)								VE (%)
Cre-negative								Cre-negative								Cre-negative
Basal	Hypoxia							Basal	Hypoxia							Basal	Hypoxia
0 min	1 min	3 min	5 min	7 min	9 min	recovery		0 min	1 min	3 min	5 min	7 min	9 min	recovery		0 min	1 min	3 min	5 min	7 min	9 min	recovery
93.72	158.88	124.34	115.94	118.74	112.1	100.94		75.37	197.04	235.86	153.71	138.12	134	102.4		69.37	313.07	293.26	178.52	164.7	151.31	82.08
84.21	123.16	137.85	130.44	114.36	113.38	109.6		79.01	103.59	132.88	158.84	141.62	137.66	110.83		65.34	127.58	183.17	208.86	161.97	155.41	109.2
107.99	136.56	126.87	136.56	101.76	100	103.96		98.59	114.69	154.18	175.41	149.13	144.52	104.8		104.57	156.62	195.62	239.55	151.76	144.52	115.36
101.81	142.99	131.78	118.22	129.44	112.15	103.74		101.56	133.21	170.94	157.33	145.76	150.47	104.49		101.55	190.48	225.26	186	188.67	168.76	105.65
90.49	163.2	143.43	139.51	125.1	118.2	122.77		108.13	151.68	168.85	165.02	153.96	151.26	93.46		96.09	247.55	242.17	230.23	192.62	178.79	107.98
114.72	132.79	126.28	113.06	109.91	103.15	120.32		138.51	119.54	137.46	128.5	122.02	107.53	102.76		156.05	158.74	173.59	145.28	134.11	110.92	119.93
118.21	164.65	140.6	115.23	116.22	121.94	101.02		116.22	145.93	138.63	136.08	121.77	117.2	100.86		134.93	240.28	194.91	156.8	141.53	142.92	98.79
88.86	144.66	133.67	116.53	116.87	121	95.3		82.61	111.75	165.3	175.3	146.59	144	92.31		72.09	161.66	220.96	204.28	171.31	174.25	72.42
100.001	145.861	133.102	123.186	116.55	112.74	107.206		100	134.679	163.013	156.274	139.871	135.83	101.489		99.9988	199.498	216.118	193.69	163.334	153.36	101.426		Mean
12.6418	15.1447	7.06755	10.5915	8.55146	7.91131	9.72315		21.2679	30.3025	33.0418	16.8952	12.0504	15.8084	6.08021		32.3348	62.17	38.7312	33.3258	20.8064	21.768	16.3897		SD
4.46954	5.35447	2.49876	3.74466	3.0234	2.79707	3.43765		7.51933	10.7135	11.682	5.97335	4.26046	5.58912	2.14968		11.4321	21.9804	13.6936	11.7824	7.35617	7.69617	5.79463		SEM
8	8	8	8	8	8	8		8	8	8	8	8	8	8		8	8	8	8	8	8	8		n
Phox2b∆8								Phox2b∆8								Phox2b∆8
Basal	Hypoxia							Basal	Hypoxia							Basal	Hypoxia
0 min	1 min	3 min	5 min	7 min	9 min	recovery		0 min	1 min	3 min	5 min	7 min	9 min	recovery		0 min	1 min	3 min	5 min	7 min	9 min	recovery
76.14	204.96	148.71	115.49	109.83	107.86	116.4		64.79	157.74	166.41	127.36	117.63	111.19	113.46		50.84	323.3	247.46	147.63	129.3	120.22	132.07
92.14	171.29	153.59	139.23	123.44	122.97	122.01		73.06	119.78	127.71	121.19	122.74	114.2	89.24		66.73	205.18	196.15	168.74	151.52	140.43	108.88
119.47	108.49	118.82	89.3	89.3	88.93	84.5		106.52	93.73	123.86	128.95	131.3	122.09	71.22		126.15	101.69	147.17	115.15	117.25	108.58	60.18
119.47	146.13	114.76	112.18	107.01	93.73	85.24		83.47	122.21	135.28	132.48	114.3	112.72	83.52		98.85	178.58	155.25	148.62	122.31	105.65	71.19
101.39	174.35	122.17	123.04	115.65	113.91	86.52		89.9	152.74	152.76	145.29	137.69	125.69	77.03		90.36	266.3	186.64	178.77	159.25	143.18	66.65
90.81	139.32	126.21	119.42	107.77	111.17	66.99		135.51	101.86	130.53	133.93	116.36	106.58	75.62		121.99	141.91	164.74	159.94	125.4	118.48	50.66
102.27	133.19	106.03	96.98	98.28	97.41	102.16		117.48	114.75	105.92	103.39	91.57	84.35	96.13		119.11	152.84	112.32	100.27	89.99	82.17	98.2
98.31	155.16	130.49	128.25	127.35	126.91	101.79		129.28	119.66	117	126.28	109.44	112.7	79.62		125.98	185.67	152.68	161.95	139.38	143.03	81.05
100	154.111	127.597	115.486	109.829	107.861	95.7012		100.001	122.809	132.434	127.359	117.629	111.19	85.73		100.001	194.434	170.301	147.634	129.3	120.217	83.61		Mean
14.5584	29.5028	16.3362	16.2056	12.4965	13.659	18.2949		26.2055	22.3123	19.3327	11.9952	14.0117	12.4463	13.7326		28.8478	71.0182	40.2731	26.9148	21.537	21.5622	27.4719		SD
5.14719	10.4308	5.77572	5.72954	4.41817	4.82918	6.46821		9.26504	7.88861	6.83514	4.24093	4.95387	4.40044	4.85521		10.1993	25.1087	14.2387	9.5158	7.61447	7.6234	9.71278		SEM
8	8	8	8	8	8	8		8	8	8	8	8	8	8		8	8	8	8	8	8	8		n
