# Supplementary material for: Phox2b mutation mediated by Atoh1 expression impaired respiratory rhythm and ventilatory responses to hypoxia and hypercapnia
Source: eLife. 2022 Nov 17;11:e73130. doi: 10.7554/eLife.73130 (PMC9683783; doi:10.7554/eLife.73130)
Supplement: Figure 5—source data 1. [file elife-73130-fig5-data1.xlsx]

## Sheet: Planilha1
Total Phox2b			Total TH			Phox2b+/TH-
Control	Phox2b∆8		Control	Phox2b∆8		Control	Phox2b∆8
256	189		145	134		234	165
248	226		139	145		237	214
352	254		129	219		321	241
279	87		174	212		260	63
301	54		188	157		277	32
115	61		163	154		92	32
258.5	145.167		156.333	170.167		236.833	124.5		Mean
79.5959	88.4068		22.5181	36.0855		77.7417	93.9335		SD
32.4949	36.0919		9.19299	14.7319		31.7379	38.3482		SEM
6	6		6	6		6	6		n
