# Supplementary material for: Phox2b mutation mediated by Atoh1 expression impaired respiratory rhythm and ventilatory responses to hypoxia and hypercapnia
Source: eLife. 2022 Nov 17;11:e73130. doi: 10.7554/eLife.73130 (PMC9683783; doi:10.7554/eLife.73130)
Supplement: Figure 6—source data 1. [file elife-73130-fig6-data1.xlsx]

## Sheet: Figure 8
Total Fos			Total TH			Fos=/TH-
Control	P2b/Atoh1		Control	P2b/Atoh1		Control	P2b/Atoh1
55	35		132	156		50	32
152	62		146	143		141	50
73	34		115	209		68	18
89	36		189	201		85	24
93	74		201	138		82	68
101	40		174	166		92	32
93.8333	46.8333		159.5	168.833		86.3333	37.3333		Mean
32.8659	16.9519		33.8275	29.7954		30.6507	18.4896		SD
13.4174	6.92058		13.81	12.1639		12.5131	7.54836		SEM
6	6		6	6		6	6		n
